# Supplementary material for: Radical formation of amino acid precursors in interstellar regions? Ser, Cys and Asp
Source: Royal Society of Chemistry journal article supplement (doi:10.1039/c0ob00232a), 2010-01-01
Supplement: c0ob00232a.pdf [file c0ob00232a.pdf]

## Electronic Supplementary Information

### Radical formation of amino acid precursors in interstellar regions? Ser, Cys and Asp.

Daniel J. Knowles, Tianfang Wang and John H. Bowie\*

Department of Chemistry, The University of Adelaide, South Australia, 5005.

\* Corresponding author. e-mail: [john.bowie@adelaide.edu.au](mailto:john.bowie@adelaide.edu.au)

Tables S1-S4 contain data concerning the geometries [B3LYP/6-31+G(d) level of theory] and single point energies [calculated at CCSD(T)/aug-cc-pVDZ] of all minima and transition states shown in the appropriate Figures in the text. Relative energies with zero-point corrections are recorded in  $\text{kJ mol}^{-1}$  units in all tables.

**Table S1 Energy and geometry data of minima and transition state for the interconversion of doublet  $\text{NH}_2\text{CH}_2\cdot$  and  $\text{CH}_3\text{NH}\cdot$  Relative energies in  $\text{kJ mol}^{-1}$  with respect to A (0  $\text{kJ mol}^{-1}$ )**

|                                              | 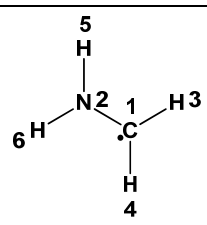<br><b>A</b> | <br><b>TS A/B</b> | <br><b>B</b> |
|----------------------------------------------|-----------------------------------------------------------------------------------------------|-----------------------------------------------------------------------------------------------------|-------------------------------------------------------------------------------------------------|
| State                                        | $^2\text{A}$                                                                                  | $^2\text{A}$                                                                                        | $^2\text{A}$                                                                                    |
| Symmetry                                     | $\text{C}_1$                                                                                  | $\text{C}_1$                                                                                        | $\text{C}_1$                                                                                    |
| Energy (Hartrees)                            | -94.91061                                                                                     | -94.84318                                                                                           | -94.90351                                                                                       |
| $\Delta E_r^\circ$ ( $\text{kJ mol}^{-1}$ )  | 0                                                                                             | 177                                                                                                 | 19                                                                                              |
| $\Delta G^\circ$ ( $\text{kJ mol}^{-1}$ )    | 0                                                                                             | 177                                                                                                 | 18                                                                                              |
| <b>Bond Length (<math>\text{\AA}</math>)</b> |                                                                                               |                                                                                                     |                                                                                                 |
| $\text{C}^1\text{N}^2$                       | 1.399                                                                                         | 1.450                                                                                               | 1.444                                                                                           |
| $\text{C}^1\text{H}^3$                       | 1.085                                                                                         | 1.089                                                                                               | 1.104                                                                                           |
| $\text{C}^1\text{H}^4$                       | 1.085                                                                                         | 1.085                                                                                               | 1.104                                                                                           |
| $\text{C}^1\text{H}^6$                       | -                                                                                             | 1.290                                                                                               | 1.094                                                                                           |
| $\text{N}^2\text{H}^5$                       | 1.014                                                                                         | 1.026                                                                                               | 1.030                                                                                           |
| $\text{N}^2\text{H}^6$                       | 1.014                                                                                         | -                                                                                                   | -                                                                                               |
| <b>Bond Angle (<math>^\circ</math>)</b>      |                                                                                               |                                                                                                     |                                                                                                 |
| $\text{C}^1\text{N}^2\text{H}^5$             | 115.4                                                                                         | 107.2                                                                                               | 106.9                                                                                           |
| $\text{C}^1\text{N}^2\text{H}^6$             | 115.4                                                                                         | 56.5                                                                                                | -                                                                                               |
| $\text{H}^3\text{C}^1\text{H}^4$             | 118.1                                                                                         | 118.3                                                                                               | 106.0                                                                                           |
| $\text{H}^5\text{N}^2\text{H}^6$             | 110.9                                                                                         | 103.1                                                                                               | -                                                                                               |
| $\text{H}^3\text{C}^1\text{N}^2$             | 116.1                                                                                         | 121.4                                                                                               | 111.4                                                                                           |
| $\text{H}^4\text{C}^1\text{N}^2$             | 116.1                                                                                         | 114.7                                                                                               | 111.5                                                                                           |
| $\text{H}^6\text{C}^1\text{N}^2$             | -                                                                                             | 53.9                                                                                                | -                                                                                               |
| <b>Dihedral Angle (<math>^\circ</math>)</b>  |                                                                                               |                                                                                                     |                                                                                                 |
| $\text{H}^6\text{N}^2\text{C}^1\text{H}^5$   | -                                                                                             | 94.6                                                                                                | -                                                                                               |
| $\text{H}^5\text{N}^2\text{C}^1\text{H}^3$   | -41.4                                                                                         | -15.2                                                                                               | -59.3                                                                                           |
| $\text{H}^5\text{N}^2\text{C}^1\text{H}^4$   | 172.9                                                                                         | -168.7                                                                                              | 59.1                                                                                            |
| $\text{H}^6\text{N}^2\text{C}^1\text{H}^3$   | -172.9                                                                                        | -109.8                                                                                              | -                                                                                               |
| $\text{H}^6\text{N}^2\text{C}^1\text{H}^4$   | 41.4                                                                                          | 96.6                                                                                                | -                                                                                               |
| $\text{H}^5\text{N}^2\text{C}^1\text{H}^6$   | -                                                                                             | 94.6                                                                                                | 179.9                                                                                           |

**Table S2 Energy and geometry data of minima and transition state for the reaction between NH<sub>2</sub>CH<sub>2</sub>CN and HO<sup>•</sup>. Relative energies in kJ mol<sup>-1</sup> with respect to [A+B] (0 kJ mol<sup>-1</sup>)**

|                                                                                                                               | 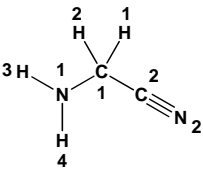 |  |  |  |
|-------------------------------------------------------------------------------------------------------------------------------|-----------------------------------------------------------------------------------|-----------------------------------------------------------------------------------|------------------------------------------------------------------------------------|-------------------------------------------------------------------------------------|
|                                                                                                                               | <b>A</b>                                                                          | <b>TS [A+B]/C</b>                                                                 | <b>C</b>                                                                           | <b>D</b>                                                                            |
| <b>State</b>                                                                                                                  | <sup>1</sup> A                                                                    | <sup>2</sup> A                                                                    | <sup>2</sup> A                                                                     | <sup>2</sup> A                                                                      |
| <b>Symmetry</b>                                                                                                               | C <sub>1</sub>                                                                    | C <sub>1</sub>                                                                    | C <sub>1</sub>                                                                     | C <sub>1</sub>                                                                      |
| <b>Energy (Hartrees)</b>                                                                                                      | -187.58000                                                                        | -263.15176                                                                        | -263.208618                                                                        | -186.951365                                                                         |
| <b>ΔE (kJ mol<sup>-1</sup>)</b>                                                                                               | 0 [A+B]                                                                           | 11                                                                                | -138                                                                               | -128 [D+E]                                                                          |
| <b>ΔG (kJ mol<sup>-1</sup>)</b>                                                                                               | 0 [A+B]                                                                           | 41                                                                                | -114                                                                               | -130 [D+E]                                                                          |
| <b>Bond Length (Å)</b>                                                                                                        |                                                                                   |                                                                                   |                                                                                    |                                                                                     |
| C <sup>1</sup> N <sup>1</sup>                                                                                                 | 1.460                                                                             | 1.436                                                                             | 1.391                                                                              | 1.383                                                                               |
| C <sup>1</sup> H <sup>1</sup>                                                                                                 | 1.095                                                                             | 1.094                                                                             | 1.083                                                                              | 1.083                                                                               |
| C <sup>1</sup> H <sup>2</sup>                                                                                                 | 1.095                                                                             | 1.144                                                                             | -                                                                                  | -                                                                                   |
| N <sup>1</sup> H <sup>3</sup>                                                                                                 | 1.018                                                                             | 1.015                                                                             | 1.016                                                                              | 1.012                                                                               |
| N <sup>1</sup> H <sup>4</sup>                                                                                                 | 1.018                                                                             | 1.015                                                                             | 1.015                                                                              | 1.013                                                                               |
| C <sup>2</sup> N <sup>2</sup>                                                                                                 | 1.162                                                                             | 1.163                                                                             | 1.176                                                                              | 1.176                                                                               |
| C <sup>1</sup> C <sup>2</sup>                                                                                                 | 1.483                                                                             | 1.475                                                                             | 1.391                                                                              | 1.391                                                                               |
| OH <sup>2</sup>                                                                                                               | -                                                                                 | 1.597                                                                             | 0.975                                                                              | -                                                                                   |
| OH <sup>5</sup>                                                                                                               | -                                                                                 | 0.982                                                                             | 0.969                                                                              | -                                                                                   |
| N <sup>1</sup> H <sup>2</sup>                                                                                                 | -                                                                                 | -                                                                                 | 2.108                                                                              | -                                                                                   |
| <b>Bond Angle (°)</b>                                                                                                         |                                                                                   |                                                                                   |                                                                                    |                                                                                     |
| C <sup>1</sup> N <sup>1</sup> H <sup>3</sup>                                                                                  | 111.1                                                                             | 114.1                                                                             | 115.3                                                                              | 117.1                                                                               |
| C <sup>1</sup> N <sup>1</sup> H <sup>4</sup>                                                                                  | 111.1                                                                             | 114.0                                                                             | 116.1                                                                              | 117.7                                                                               |
| H <sup>1</sup> C <sup>1</sup> N <sup>1</sup>                                                                                  | 108.9                                                                             | 110.0                                                                             | 117.5                                                                              | 117.5                                                                               |
| H <sup>2</sup> C <sup>1</sup> N <sup>1</sup>                                                                                  | 108.9                                                                             | 108.9                                                                             | -                                                                                  | -                                                                                   |
| N <sup>1</sup> C <sup>1</sup> C <sup>2</sup>                                                                                  | 115.5                                                                             | 116.1                                                                             | 121.6                                                                              | 121.8                                                                               |
| C <sup>1</sup> C <sup>2</sup> N <sup>2</sup>                                                                                  | 177.6                                                                             | 178.2                                                                             | 179.3                                                                              | 179.2                                                                               |
| H <sup>1</sup> C <sup>1</sup> C <sup>2</sup>                                                                                  | 108.2                                                                             | 109.6                                                                             | 120.5                                                                              | 120.3                                                                               |
| H <sup>2</sup> C <sup>1</sup> C <sup>2</sup>                                                                                  | 108.2                                                                             | 106.8                                                                             | -                                                                                  | -                                                                                   |
| OH <sup>2</sup> C <sup>1</sup>                                                                                                | -                                                                                 | 174.4                                                                             | -                                                                                  | -                                                                                   |
| H <sup>5</sup> OH <sup>2</sup>                                                                                                | -                                                                                 | 102.7                                                                             | 106.3                                                                              | -                                                                                   |
| H <sup>2</sup> N <sup>1</sup> C <sup>1</sup>                                                                                  | -                                                                                 | -                                                                                 | 114.1                                                                              | -                                                                                   |
| OH <sup>2</sup> N <sup>1</sup>                                                                                                | -                                                                                 | -                                                                                 | 149.1                                                                              | -                                                                                   |
| <b>Dihedral Angle (°)</b>                                                                                                     |                                                                                   |                                                                                   |                                                                                    |                                                                                     |
| H <sup>3</sup> N <sup>1</sup> C <sup>1</sup> H <sup>1</sup>                                                                   | -62.2                                                                             | 38.1                                                                              | 29.8                                                                               | -25.4                                                                               |
| H <sup>4</sup> N <sup>1</sup> C <sup>1</sup> H <sup>1</sup>                                                                   | 178.2                                                                             | 166.7                                                                             | 163.9                                                                              | -167.3                                                                              |
| H <sup>3</sup> N <sup>1</sup> C <sup>1</sup> C <sup>2</sup>                                                                   | 59.8                                                                              | -87.0                                                                             | -157.9                                                                             | 161.4                                                                               |
| H <sup>4</sup> N <sup>1</sup> C <sup>1</sup> C <sup>2</sup>                                                                   | -59.8                                                                             | 41.5                                                                              | -23.8                                                                              | 19.5                                                                                |
| H <sup>1</sup> C <sup>1</sup> C <sup>2</sup> N <sup>2</sup>                                                                   | 122.3                                                                             | -171.1                                                                            | -109.9                                                                             | 98.7                                                                                |
| H <sup>2</sup> C <sup>1</sup> C <sup>2</sup> N <sup>2</sup>                                                                   | -122.3                                                                            | 75.8                                                                              | -                                                                                  | -                                                                                   |
| OH <sup>2</sup> C <sup>1</sup> C <sup>2</sup>                                                                                 | -                                                                                 | 31.1                                                                              | -                                                                                  | -                                                                                   |
| H <sup>5</sup> OH <sup>2</sup> C <sup>1</sup>                                                                                 | -                                                                                 | -18.4                                                                             | -                                                                                  | -                                                                                   |
| OH <sup>2</sup> N <sup>1</sup> C <sup>1</sup>                                                                                 | -                                                                                 | -                                                                                 | 123.1                                                                              | -                                                                                   |
| H <sup>5</sup> OH <sup>2</sup> N <sup>1</sup>                                                                                 | -                                                                                 | -                                                                                 | -177.7                                                                             | -                                                                                   |
| <b>•O-H, [B], State <sup>2</sup>Σ, Symmetry C<sub>∞v</sub>, Energy -75.57593 Hartree, OH 0.967 Å</b>                          |                                                                                   |                                                                                   |                                                                                    |                                                                                     |
| <b>H-O-H, [E], State <sup>1</sup>A<sub>1</sub>, Symmetry C<sub>2v</sub>, Energy -76.25314 Hartree, OH 0.959 Å, HOH 104.5°</b> |                                                                                   |                                                                                   |                                                                                    |                                                                                     |

**Table S3 Energy and geometry data of minima and transition state for the interconversion of doublet  $\cdot\text{CH}_2\text{SH}$  and  $\text{CH}_3\text{S}\cdot$ . Relative energies in  $\text{kJ mol}^{-1}$  with respect to A ( $0 \text{ kJ mol}^{-1}$ )**

|                                                                      | 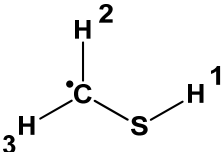<br><b>A</b> | <br><b>TS A/B</b> | <br><b>B</b> |
|----------------------------------------------------------------------|-----------------------------------------------------------------------------------------------|-----------------------------------------------------------------------------------------------------|-------------------------------------------------------------------------------------------------|
| <b>State</b>                                                         | $^2\text{A}$                                                                                  | $^2\text{A}$                                                                                        | $^2\text{A}$                                                                                    |
| <b>Symmetry</b>                                                      | $\text{C}_1$                                                                                  | $\text{C}_1$                                                                                        | $\text{C}_1$                                                                                    |
| <b>Energy (Hartrees)</b>                                             | -437.38893                                                                                    | -437.34623                                                                                          | -437.40532                                                                                      |
| <b><math>\Delta\text{E}</math> (<math>\text{kJ mol}^{-1}</math>)</b> | 0                                                                                             | 50                                                                                                  | -43                                                                                             |
| <b><math>\Delta\text{G}</math> (<math>\text{kJ mol}^{-1}</math>)</b> | 0                                                                                             | 114                                                                                                 | -41                                                                                             |
| <b>Bond Length(<math>\text{\AA}</math>)</b>                          |                                                                                               |                                                                                                     |                                                                                                 |
| CS                                                                   | 1.731                                                                                         | 1.793                                                                                               | 1.810                                                                                           |
| CH <sup>1</sup>                                                      | -                                                                                             | 1.492                                                                                               | 1.092                                                                                           |
| CH <sup>3</sup>                                                      | 1.081                                                                                         | 1.081                                                                                               | 1.092                                                                                           |
| CH <sup>2</sup>                                                      | 1.081                                                                                         | 1.081                                                                                               | 1.092                                                                                           |
| SH <sup>1</sup>                                                      | 1.341                                                                                         | 1.451                                                                                               | -                                                                                               |
| <b>Bond Angle(<math>^\circ</math>)</b>                               |                                                                                               |                                                                                                     |                                                                                                 |
| H <sup>1</sup> SC                                                    | 97.8                                                                                          | 53.6                                                                                                | -                                                                                               |
| H <sup>2</sup> CS                                                    | 121.7                                                                                         | 119.4                                                                                               | 111.7                                                                                           |
| H <sup>3</sup> CS                                                    | 116.7                                                                                         | 119.4                                                                                               | 106.8                                                                                           |
| H <sup>3</sup> CH <sup>2</sup>                                       | 120.8                                                                                         | 120.4                                                                                               | 107.8                                                                                           |
| SCH <sup>1</sup>                                                     | -                                                                                             | 51.6                                                                                                | 111.7                                                                                           |
| H <sup>3</sup> CH <sup>1</sup>                                       | -                                                                                             | 111.0                                                                                               | 110.6                                                                                           |
| H <sup>2</sup> CH <sup>1</sup>                                       | -                                                                                             | 111.0                                                                                               | 107.8                                                                                           |
| <b>Dihedral Angle(<math>^\circ</math>)</b>                           |                                                                                               |                                                                                                     |                                                                                                 |
| H <sup>1</sup> SCH <sup>2</sup>                                      | -15.4                                                                                         | 94.5                                                                                                | -                                                                                               |
| H <sup>1</sup> SCH <sup>3</sup>                                      | 179.1                                                                                         | -94.5                                                                                               | -                                                                                               |

**Table S4 Energy and geometry data of minima and transition states for the interconversion of  $\cdot\text{CH}_2\text{CN}$  and  $\cdot\text{CH}_2\text{NC}$ . Relative energies in  $\text{kJ mol}^{-1}$  with respect to A ( $0 \text{ kJ mol}^{-1}$ )**

|                                                                      | 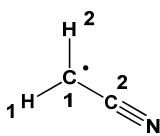 |  |  |  |  |
|----------------------------------------------------------------------|-----------------------------------------------------------------------------------|-----------------------------------------------------------------------------------|------------------------------------------------------------------------------------|-------------------------------------------------------------------------------------|-------------------------------------------------------------------------------------|
|                                                                      | <b>A</b>                                                                          | <b>TS A/B</b>                                                                     | <b>B</b>                                                                           | <b>TS B/C</b>                                                                       | <b>C</b>                                                                            |
| <b>State</b>                                                         | $^2\text{A}$                                                                      | $^2\text{A}$                                                                      | $^2\text{A}$                                                                       | $^2\text{A}$                                                                        | $^2\text{A}$                                                                        |
| <b>Symmetry</b>                                                      | $\text{C}_1$                                                                      | $\text{C}_1$                                                                      | $\text{C}_1$                                                                       | $\text{C}_1$                                                                        | $\text{C}_1$                                                                        |
| <b>Energy (Hartrees)</b>                                             | -131.76223                                                                        | -131.67871                                                                        | -131.68230                                                                         | -131.67920                                                                          | -131.72525                                                                          |
| <b><math>\Delta\text{E}</math> (<math>\text{kJ mol}^{-1}</math>)</b> | 0                                                                                 | 219                                                                               | 210                                                                                | 218                                                                                 | 97                                                                                  |
| <b><math>\Delta\text{G}</math> (<math>\text{kJ mol}^{-1}</math>)</b> | 0                                                                                 | 214                                                                               | 211                                                                                | 213                                                                                 | 96                                                                                  |
| <b>Bond Length (<math>\text{\AA}</math>)</b>                         |                                                                                   |                                                                                   |                                                                                    |                                                                                     |                                                                                     |
| $\text{C}^1\text{C}^2$                                               | 1.38                                                                              | 1.498                                                                             | 1.498                                                                              | 1.787                                                                               | -                                                                                   |
| $\text{C}^2\text{N}$                                                 | 1.178                                                                             | 1.197                                                                             | -                                                                                  | 1.223                                                                               | 1.198                                                                               |
| $\text{C}^1\text{N}$                                                 | -                                                                                 | -                                                                                 | 1.635                                                                              | 1.461                                                                               | 1.336                                                                               |
| $\text{C}^1\text{H}^1$                                               | 1.083                                                                             | 1.085                                                                             | 1.085                                                                              | 1.083                                                                               | 1.083                                                                               |
| $\text{C}^1\text{H}^2$                                               | 1.083                                                                             | 1.085                                                                             | 1.085                                                                              | 1.083                                                                               | 1.083                                                                               |
| <b>Bond Angle (<math>^\circ</math>)</b>                              |                                                                                   |                                                                                   |                                                                                    |                                                                                     |                                                                                     |
| $\text{C}^1\text{C}^2\text{N}$                                       | -                                                                                 | 94.1                                                                              | 73.1                                                                               | -                                                                                   | -                                                                                   |
| $\text{C}^1\text{NC}^2$                                              | -                                                                                 | -                                                                                 | -                                                                                  | 82.9                                                                                | -                                                                                   |
| $\text{H}^2\text{C}^1\text{N}$                                       | -                                                                                 | -                                                                                 | -                                                                                  | -                                                                                   | 118.9                                                                               |
| $\text{H}^2\text{C}^1\text{N}$                                       | -                                                                                 | -                                                                                 | -                                                                                  | -                                                                                   | 118.9                                                                               |
| $\text{C}^2\text{C}^1\text{H}^2$                                     | 120.2                                                                             | 118.9                                                                             | 120.2                                                                              | -                                                                                   | -                                                                                   |
| $\text{C}^2\text{C}^1\text{H}^1$                                     | 120.2                                                                             | 118.9                                                                             | 120.2                                                                              | -                                                                                   | -                                                                                   |
| $\text{H}^1\text{C}^1\text{H}^2$                                     | 119.5                                                                             | 120.7                                                                             | 118.2                                                                              | 120.4                                                                               | 122.1                                                                               |
| $\text{H}^1\text{C}^1\text{N}$                                       | -                                                                                 | -                                                                                 | -                                                                                  | 118.5                                                                               | -                                                                                   |
| $\text{H}^2\text{C}^1\text{N}$                                       | -                                                                                 | -                                                                                 | -                                                                                  | 118.5                                                                               | -                                                                                   |
| <b>Dihedral Angle (<math>^\circ</math>)</b>                          |                                                                                   |                                                                                   |                                                                                    |                                                                                     |                                                                                     |
| $\text{H}^2\text{C}^1\text{C}^2\text{N}$                             | -78.0                                                                             | 83.4                                                                              | 96.8                                                                               | -                                                                                   | -                                                                                   |
| $\text{H}^2\text{C}^1\text{C}^2\text{N}$                             | 101.9                                                                             | -83.4                                                                             | 96.8                                                                               | -                                                                                   | -                                                                                   |
| $\text{H}^1\text{C}^1\text{NC}^2$                                    | -                                                                                 | -                                                                                 | -                                                                                  | -98.7                                                                               | 87.3                                                                                |
| $\text{H}^2\text{C}^1\text{NC}^2$                                    | -                                                                                 | -                                                                                 | -                                                                                  | 98.7                                                                                | -92.7                                                                               |
